# Supplementary figures and images for: Rapid Determination of RNA Modifications in Consensus Motifs by Nuclease Protection with Ion-Tagged Oligonucleotide Probes and Matrix-Assisted Laser Desorption Ionization Mass Spectrometry
Source: MDPI journal article supplement (doi:10.3390/genes13061008), 2022-06-02

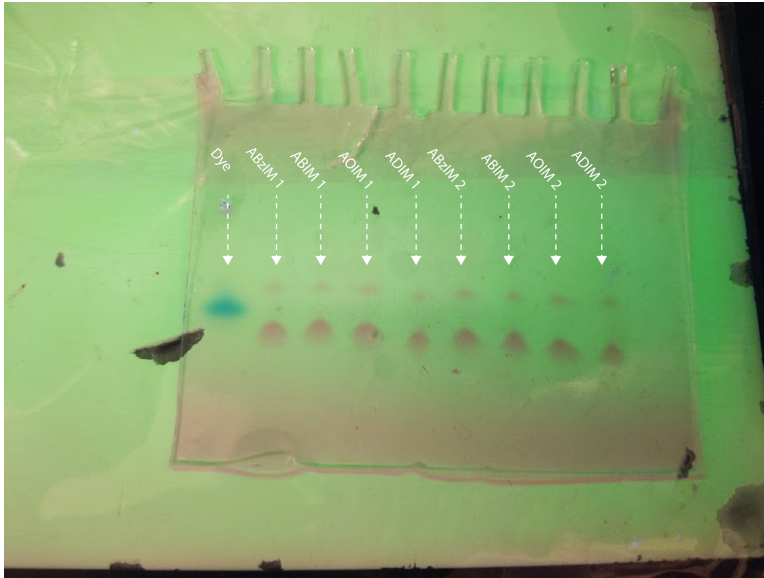

Supplement: s1 [file s1]
